# Supplementary material
Source: PubMed Central journal article supplement (PMC4285369)
Supplement: NIHMS648690-supplement-Supp_Exhibit_1-2.pdf [file NIHMS648690-supplement-Supp_Exhibit_1-2.pdf]

Supplemental EXHIBIT 1 (Table)

Comparison of ED Costs Using Hospital-Specific versus Regional Average Cost-to-Charge Ratios

SOURCE: Author's Analysis

| Visit Category                                                 | ED Revenue (millions)* | ED Costs (millions)† | Absolute Difference | Percent Change |
|----------------------------------------------------------------|------------------------|----------------------|---------------------|----------------|
| All                                                            | 20,920                 | 21,220               | -300                | -1.43%         |
| ED Visit Acuity                                                |                        |                      |                     |                |
| Emergent                                                       | 8,382                  | 8,524                | -142                | -1.70%         |
| Intermediate                                                   | 7,892                  | 8,000                | -108                | -1.37%         |
| Non-emergent                                                   | 3,470                  | 3,515                | -45                 | -1.30%         |
| Unclassified                                                   | 1,176                  | 1,181                | -5                  | -0.40%         |
| ED Disposition                                                 |                        |                      |                     |                |
| Admission                                                      | 7,804                  | 8,168                | -363                | -4.66%         |
| Discharge                                                      | 13,116                 | 13,053               | 63                  | 0.48%          |
| Clinical Condition                                             |                        |                      |                     |                |
| Cards                                                          | 3,876                  | 3,933                | -57                 | -1.46%         |
| Complication                                                   | 407                    | 416                  | -9                  | -2.33%         |
| GI                                                             | 1,418                  | 1,444                | -26                 | -1.82%         |
| Gen/Vasc                                                       | 860                    | 872                  | -12                 | -1.42%         |
| ID                                                             | 2,226                  | 2,271                | -45                 | -2.01%         |
| Neuro                                                          | 1,936                  | 1,967                | -31                 | -1.60%         |
| Other Medical                                                  | 3,007                  | 3,041                | -34                 | -1.14%         |
| Other Surgical                                                 | 589                    | 594                  | -5                  | -0.78%         |
| Psych                                                          | 607                    | 606                  | 1                   | 0.20%          |
| Pulm                                                           | 1,580                  | 1,605                | -24                 | -1.54%         |
| Signs/Symptom                                                  | 1,895                  | 1,909                | -13                 | -0.70%         |
| Trauma                                                         | 2,518                  | 2,563                | -45                 | -1.78%         |
| * = Cost using hospital specific cost-to-charge ratios         |                        |                      |                     |                |
| † = Cost using weighted regional average cost-to-charge ratios |                        |                      |                     |                |

Wilson M, Cutler D. Emergency department profits are likely to continue as the Affordable Care Act expands coverage. Health Aff (Millwood). 2014;33(5).

Supplemental EXHIBIT 2 (Table)

Comparison of ED Profit Rate Using Uninsured Reimbursement at One-Half Medicaid.

SOURCE: Author's Analysis

| <b>Visit Category</b> | <b>ED Rev<br/>(millions)</b> | <b>ED Costs<br/>(millions)</b> | <b>Profit<br/>Margin (%)</b> |
|-----------------------|------------------------------|--------------------------------|------------------------------|
| All                   | 78,667                       | 66,898                         | 15.0%                        |
| <b>Insurance Type</b> |                              |                                |                              |
| Private               | 42,413                       | 25,626                         | 39.6%                        |
| Medicare              | 18,227                       | 21,067                         | -15.6%                       |
| Medicaid              | 10,710                       | 14,556                         | -35.9%                       |
| Uninsured             | 7,317                        | 5,649                          | 22.8%                        |
